# Supplementary material for: Stabilization of Hypoxia-Inducible Factors and BNIP3 Promoter Methylation Contribute to Acquired Sorafenib Resistance in Human Hepatocarcinoma Cells
Source: Cancers (Basel). 2019 Dec 9;11(12):1984. doi: 10.3390/cancers11121984 (PMC6966438; doi:10.3390/cancers11121984)
Supplement: Supplementary file 1 [file cancers-11-01984-s001.pdf]

## Supplementary Materials

# Stabilization of Hypoxia-Inducible Factors and BNIP3 Promoter Methylation Contribute to Acquired Sorafenib Resistance in Human Hepatocarcinoma Cells

Carolina Méndez-Blanco, Flavia Fondevila, Paula Fernández-Palanca, Andrés García-Palomo, Jos van Pelt, Chris Verslype, Javier González-Gallego and José L. Mauriz

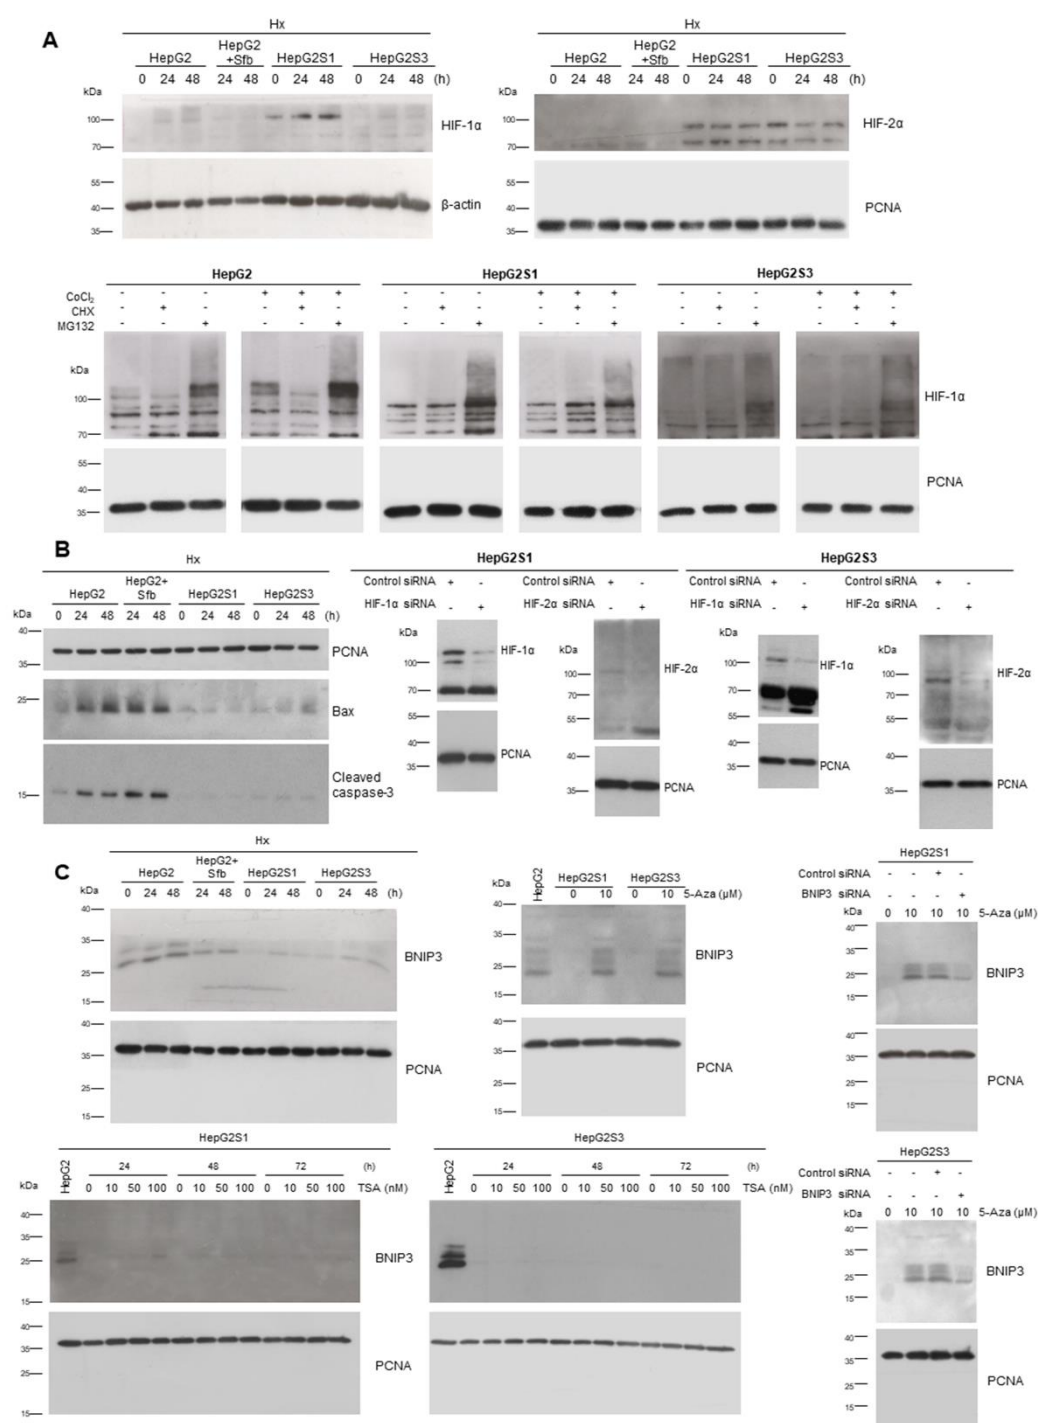

**Figure S1.** Full-length immunoblot images from Figures 2, 3 and 4: **(a)** Complete Western blot images of HIF-1 $\alpha$ , HIF-2 $\alpha$ ,  $\beta$ -actin and PCNA from Figure 2 are represented. HIF-2 $\alpha$  and PCNA were reincubated after stripping in the blots of HIF-1 $\alpha$  and  $\beta$ -actin from Figure 2a, respectively; **(b)** Full Western blot images of Bax, cleaved caspase-3 and PCNA from Figure 3b and immunoblots of HIF-1 $\alpha$ , HIF-2 $\alpha$  and PCNA from Figure 3c; **(c)** Total BNIP3 and PCNA immunoblots from Figure 4. PCNA were reincubated after stripping of BNIP3 blots. PVDF membranes from **(a)** and **(b)** were cut to incubate with different antibodies simultaneously.

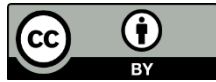

© 2019 by the authors. Licensee MDPI, Basel, Switzerland. This article is an open access article distributed under the terms and conditions of the Creative Commons Attribution (CC BY) license (<http://creativecommons.org/licenses/by/4.0/>).
